# Supplementary material for: Dissociation of mitochondrial HK-II elicits mitophagy and confers cardioprotection against ischemia
Source: PubMed Central journal article supplement (PMC6768853; doi:10.1038/s41419-019-1965-7), 2019-09-30
Supplement: 41419_2019_1965_MOESM1_ESM.pdf [file 41419_2019_1965_MOESM1_ESM.pdf]

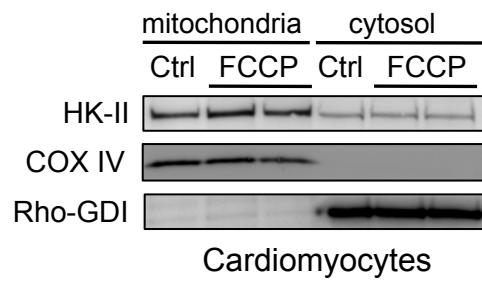

**Figure S1. FCCP does not alter mitochondrial HK-II association in NRVMs.**

NRVMs were treated with FCCP (20  $\mu$ M) and mitochondrial and cytosolic fractions were isolated for Western blot.

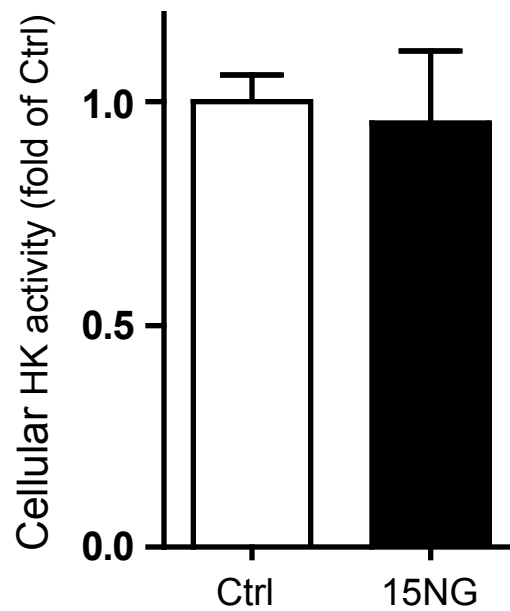

**Figure S2. 15NG expression does not alter cellular hexokinase activity.** NRVMs were infected with control or 15NG and cellular hexokinase activity was measured in whole cell lysates. n=5.

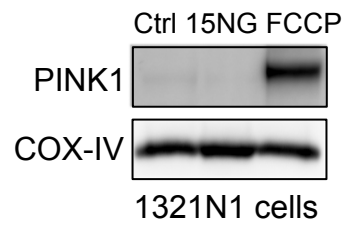

**Figure S3. 15NG expression does not increase PINK1 levels in mitochondrial fractions isolated from 1321N1 cells.**

1321N1 cells were infected with control or 15NG adenovirus and mitochondrial fractions were isolated for Western blot. FCCP was used as a positive control.

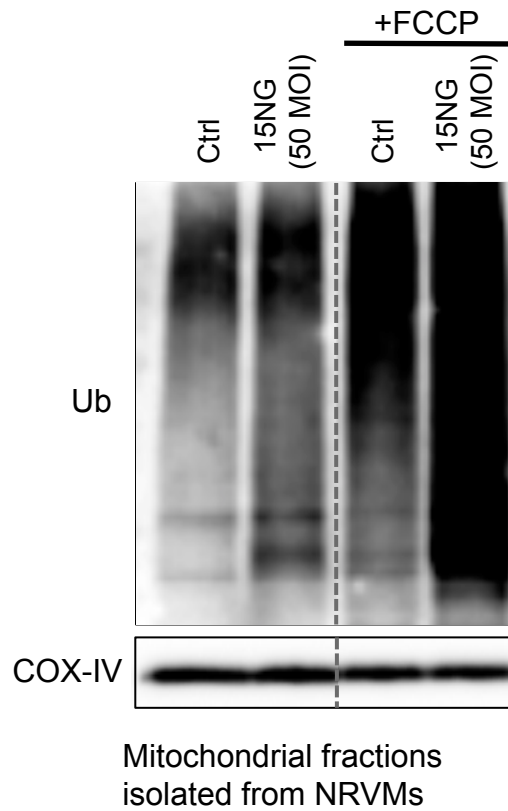

**Figure S4. Ubiquitination of mitochondrial proteins induced by 15NG (50 MOI) and FCCP was synergistic in NRVMs.**

NRVMs were infected with control or 15NG at low MOI (50), treated with FCCP (20  $\mu$ M for 16 hrs) and mitochondrial fractions isolated for Western blot.

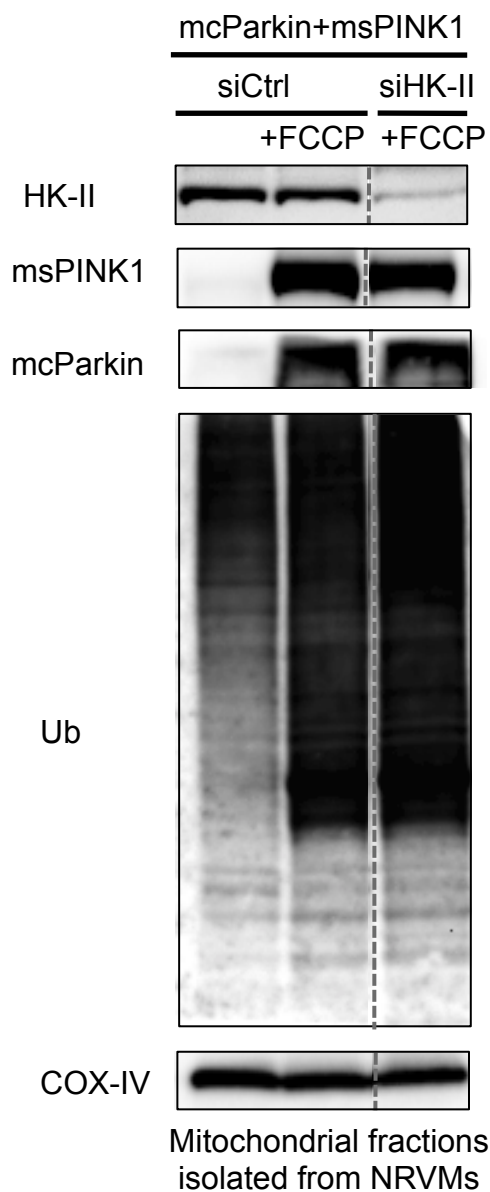

**Figure S5. Knockdown of HK-II does not inhibit FCCP-induced mitophagy in NRVMs.** NRVMs were transfected with siRNA-control or siRNA-HK-II for 48 hrs, infected with msPINK1 and mcParkin adenoviruses for 16 hrs, treated with FCCP and mitochondrial fractions isolated for Western blot.

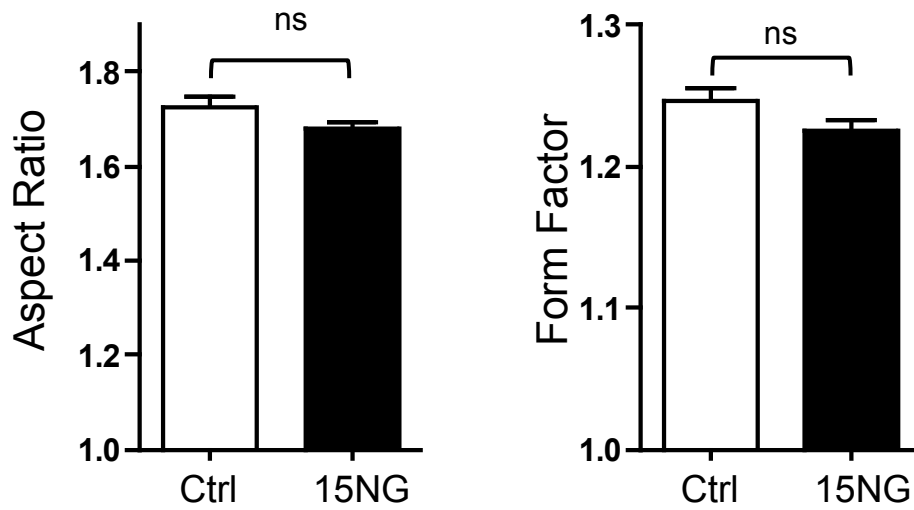

**Figure S6. 15NG expression does not induce mitochondrial fragmentation.**

NRVMs were infected with control or 15NG adenovirus and mitochondria were visualized using MitoTracker DeepRed. Aspect ratio and form factor were analyzed using ImageJ2. ns; not significant. n>30 from 3 independent experiments.

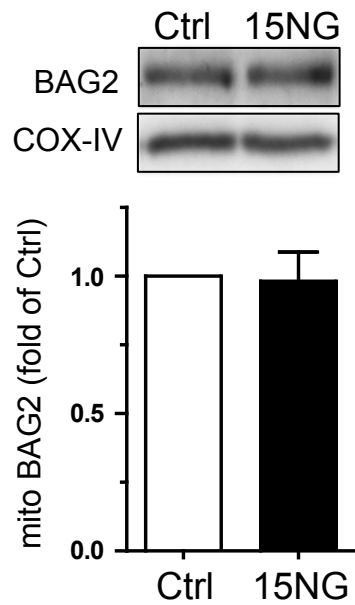

**Figure S7. 15NG expression does not affect BAG2 levels in mitochondrial fractions.**

NRVMs were infected with control or 15NG adenovirus and mitochondria were isolated for Western blot. n=3.
